# Supplementary material for: Cascaded elasto-inertial separation of malignant tumor cells from untreated malignant pleural and peritoneal effusions
Source: Royal Society of Chemistry journal article supplement (doi:10.1039/d3lc00801k), 2024-01-01
Supplement: d3lc00801k1.pdf [file d3lc00801k1.pdf]

## Supplementary Information

# **Cascaded elasto-inertial separation of malignant tumor cells from untreated malignant pleural and peritoneal effusions**

Chen Ni<sup>1</sup>, Dan Wu<sup>2</sup>, Yao Chen<sup>1</sup>, Silin Wang<sup>1</sup>, and Nan Xiang<sup>1\*</sup>

<sup>1</sup>School of Mechanical Engineering, and Jiangsu Key Laboratory for Design and Manufacture of Micro-Nano Biomedical Instruments, Southeast University, Nanjing, 211189, China.

<sup>2</sup>Department of Oncology, Jiangyin People's Hospital, Jiangyin, 214400, China.

\*E-mails: [nan.xiang@seu.edu.cn](mailto:nan.xiang@seu.edu.cn).

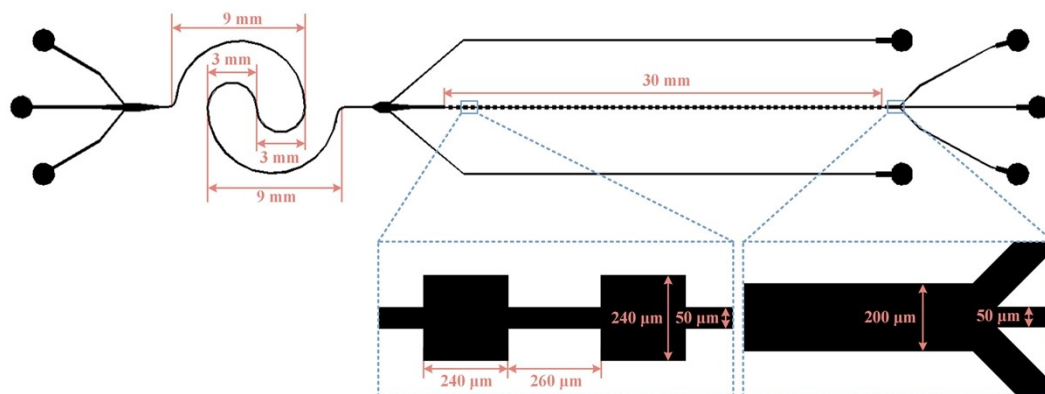

Figure S1. CAD drawing and detailed dimensions of interfacial elasto-inertial separation channel and symmetrical CEA channel.

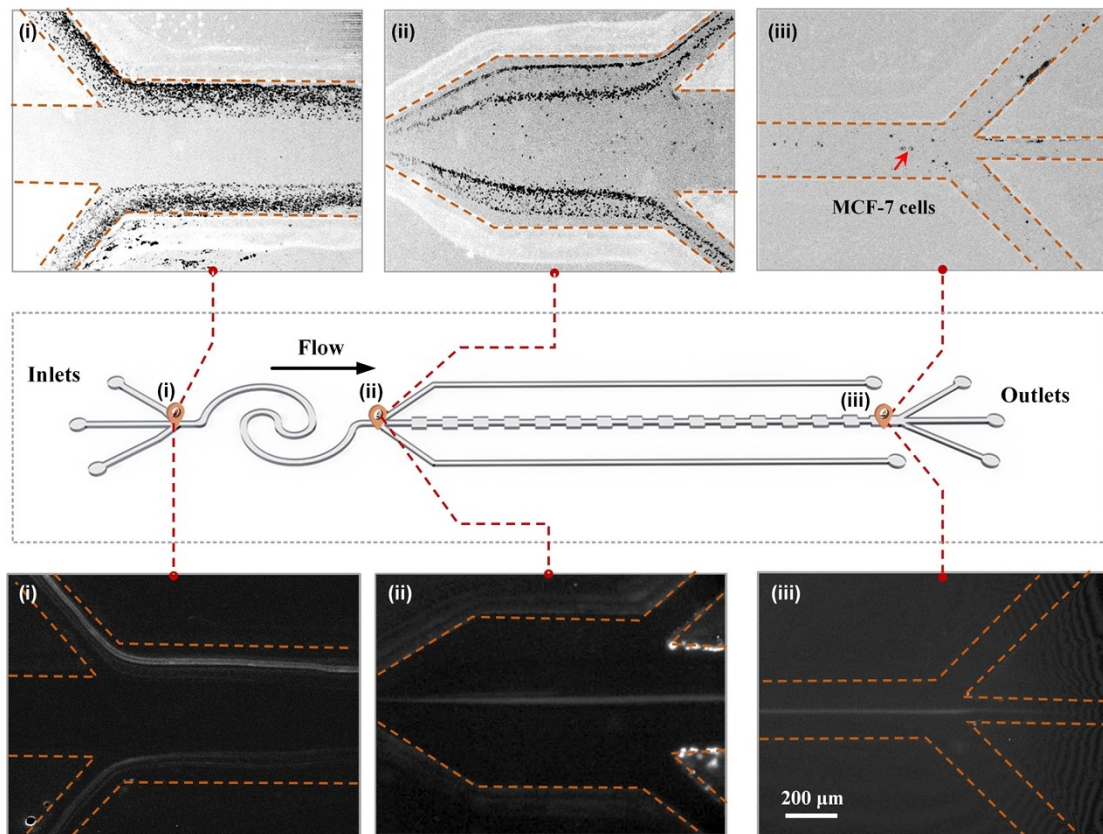

Figure S2. Bright and fluorescence images illustrating the cell distributions at the inlet (i), at the outlets of interfacial elasto-inertial separation channel (ii), and at the outlets of symmetrical CEA channel (iii). The tumor cells were stained before being spiked into the diluted blood samples. The fluorescent streams in the fluorescence images indicate the trajectories of the stained tumor cells. The concentration of tumor cells (MCF-7 cells) is  $\sim 10^3$  cells/mL.

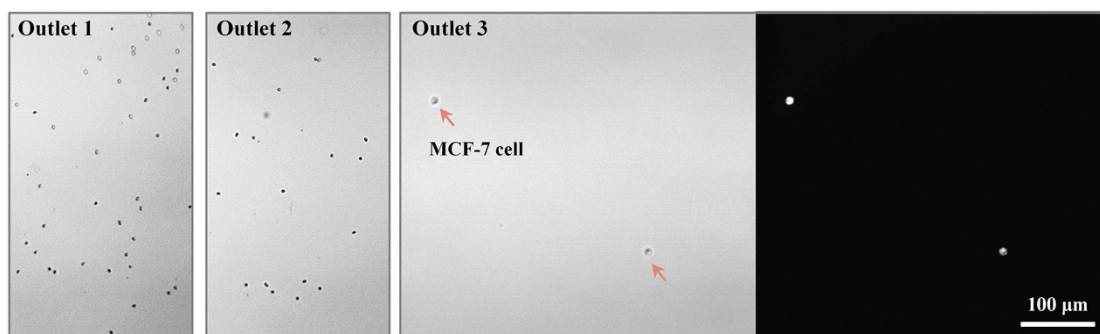

Figure S3. Microscopic images of the liquids collected from the three outlets of the CEICS device after separation using samples spiked with low-concentration tumor cells. To identify the tumor cells in the outlet 3, a fluorescent image of liquids collected from the outlet 3 is also provided. The concentration of tumor cells (MCF-7 cells) is  $\sim 10^3$  cells/mL.

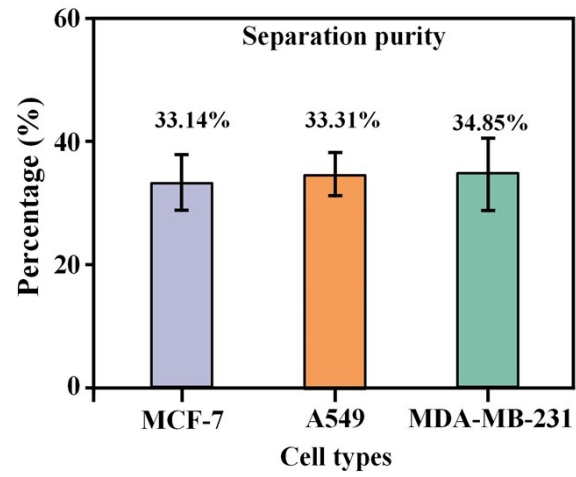

Figure S4. Purities of the collected tumor cells when separating tumor cells with concentrations of  $\sim 10^3$  cells/mL from blood samples using our CEICS device.

Table S1. Detailed comparison between this paper and previous works on MTC separation by our group

| <b>Ref</b> | <b>Microchannel structure</b>                                                       | <b>Working principle</b>   | <b>Lysis of RBCs (Yes/No)</b> | <b>Cell concentration of the blood cells</b> | <b>Recovery ratio of tumor cells (10<sup>4</sup> cells/mL)</b> |
|------------|-------------------------------------------------------------------------------------|----------------------------|-------------------------------|----------------------------------------------|----------------------------------------------------------------|
| 1          | Spiral microchannel with two inlets (using sheath fluids)                           | Inertial separation        | Yes                           | $5 \times 10^5$ cells/mL                     | ~ 83.9%                                                        |
| 2          | Traditional spiral microchannel                                                     | Inertial separation        | Yes                           | $10^5$ cells/mL                              | ~ 85.29%                                                       |
| 3          | Symmetrical serpentine microchannel                                                 | Inertial separation        | Yes                           | $10^5$ cells/mL                              | ~ 93.30%                                                       |
| This paper | Integrated an interfacial elasto-inertial microchannel with a symmetric CEA channel | Elasto-inertial separation | No                            | $10^6 \sim 10^8$ cells/mL                    | ~94.87%                                                        |

Table S2. The summary of the research on interfacial elasto-inertial microfluidics

| Authors (year)                    | Selection of sheath fluids | Selection of sample fluids | Flow rate of samples          | Confined particle size                 | Application                                               | Performance                                           |
|-----------------------------------|----------------------------|----------------------------|-------------------------------|----------------------------------------|-----------------------------------------------------------|-------------------------------------------------------|
| Faridi et al. <sup>4</sup> (2017) | 500 ppm PEO                | PBS                        | 0.5 $\mu\text{L}/\text{min}$  | 2 $\mu\text{m}$ , 5 $\mu\text{m}$      | Separation of WBCs from bacteria                          | Recovery ratio (WBCs) of 92%                          |
| Tian et al. <sup>5</sup> (2017)   | 100 ppm PEO                | PBS                        | 5 $\mu\text{L}/\text{min}$    | 1 $\mu\text{m}$ , 2 $\mu\text{m}$      | Separation of platelets from <i>Staphylococcus aureus</i> | Separation efficiency (platelets) of >90%             |
| Yuan et al. <sup>6</sup> (2017)   | PBS                        | 1000 ppm PEO               | 2 $\mu\text{L}/\text{min}$    | 5 $\mu\text{m}$ , 10 $\mu\text{m}$     | Washing of Jurkat cells                                   | Recovery ratio (Jurkat cells) of 92.8%                |
| Tian et al. <sup>7</sup> (2018)   | 500 ppm PEO                | Whole blood                | 7.5 $\mu\text{L}/\text{min}$  | 10 $\mu\text{m}$ , 15 $\mu\text{m}$    | Separation of tumor cells from whole blood                | Recovery ratio (tumor cells) of >76.3%                |
| Shi et al. <sup>8</sup> (2019)    | 150 ppm PEO                | PBS                        | 8.3 $\mu\text{L}/\text{min}$  | 10 $\mu\text{m}$ , 15 $\mu\text{m}$    | Separation of H1299 cells from blood cells                | Separation efficiency (H1299) of ~100%                |
| Shi et al. <sup>9</sup> (2020)    | 500 ppm PEO                | 100 ppm PEO                | 10 $\mu\text{L}/\text{min}$   | 10 $\mu\text{m}$ , 15 $\mu\text{m}$    | Separation of H1299 cells from blood cells                | Separation efficiency (H1299) of ~100%                |
| Zhang et al. <sup>10</sup> (2023) | 1000 ppm PEO               | PBS                        | 1 $\mu\text{L}/\text{min}$    | 1.82 $\mu\text{m}$ , 8.5 $\mu\text{m}$ | Separation of <i>L. rhamnosus</i> from <i>E. coli</i>     | Separation purity ( <i>L. rhamnosus</i> ) of 91%      |
| Zhang et al. <sup>11</sup> (2023) | 1000 ppm PEO               | PBS                        | 1 $\mu\text{L}/\text{min}$    | 1 $\mu\text{m}$ , 4.8 $\mu\text{m}$    | Separation of <i>E. coli</i> Clusters and Singlets.       | Separation purity ( <i>E. coli</i> Clusters) of 70.8% |
| Cheng et al. <sup>12</sup> (2023) | 750 ppm PEO                | 250 ppm PEO                | 18.4 $\mu\text{L}/\text{min}$ | 5 $\mu\text{m}$ , 15 $\mu\text{m}$     | Separation of tumor cells from whole blood                | Recovery ratio (tumor cells) of >77%                  |
| This paper                        | 50 ppm HA                  | PBS                        | 120 $\mu\text{L}/\text{min}$  | 10 $\mu\text{m}$ , 15 $\mu\text{m}$    | Separation of tumor cells from blood cells                | Recovery ratio (tumor cells) of >94.8%                |

| <b>No.</b> | <b>Age</b> | <b>Sex</b> | <b>Cancer type</b>  | <b>Sample</b>       |
|------------|------------|------------|---------------------|---------------------|
| 1          | 81         | Male       | Hemangiosarcoma     | Peritoneal effusion |
| 2          | 61         | Female     | Lung adenocarcinoma | Pleural effusion    |
| 3          | 80         | Female     | Lymphoma            | Pleural effusion    |
| 4          | 57         | Male       | Liver cancer        | Peritoneal effusion |
| 5          | 75         | Female     | Ovarian cancer      | Peritoneal effusion |

Table S3. Clinical information of patients.



## Reference:

1. Wang, C.; Chen, Y.; Gu, X.; Zhang, X.; Gao, C.; Dong, L.; Zheng, S.; Feng, S.; Xiang, N. Low-cost polymer-film spiral inertial microfluidic device for label-free separation of malignant tumor cells. *Electrophoresis* **2022**, *43* (3), 464-471
2. Zhu, Z.; Li, S.; Wu, D.; Ren, H.; Ni, C.; Wang, C.; Xiang, N.; Ni, Z. High-throughput and label-free enrichment of malignant tumor cells and clusters from pleural and peritoneal effusions using inertial microfluidics. *Lab on a Chip* **2022**, *22* (11), 2097-2106
3. Ren, H.; Zhu, Z.; Xiang, N.; Wang, H.; Zheng, T.; An, H.; Nam-Trung, N.; Zhang, J. Multiplexed serpentine microchannels for high-throughput sorting of disseminated tumor cells from malignant pleural effusion. *Sensors and Actuators B-Chemical* **2021**, *337*, 129758
4. Faridi, M. A.; Ramachandraiah, H.; Banerjee, I.; Ardabili, S.; Zelenin, S.; Russom, A. Elasto-inertial microfluidics for bacteria separation from whole blood for sepsis diagnostics. *Journal of Nanobiotechnology* **2017**, *15*, 1-9
5. Tian, F.; Zhang, W.; Cai, L.; Li, S.; Hu, G.; Cong, Y.; Liu, C.; Li, T.; Sun, J. Microfluidic co-flow of Newtonian and viscoelastic fluids for high-resolution separation of microparticles. *Lab on a Chip* **2017**, *17* (18), 3078-3085
6. Yuan, D.; Tan, S. H.; Sluyter, R.; Zhao, Q.; Yan, S.; Nguyen, N. T.; Guo, J.; Zhang, J.; Li, W. On-Chip Microparticle and Cell Washing Using Coflow of Viscoelastic Fluid and Newtonian Fluid. *Analytical Chemistry* **2017**, *89* (17), 9574-9582
7. Tian, F.; Cai, L.; Chang, J.; Li, S.; Liu, C.; Li, T.; Sun, J. Label-free isolation of rare tumor cells from untreated whole blood by interfacial viscoelastic microfluidics. *Lab on a Chip* **2018**, *18* (22), 3436-3445
8. Shi, X.; Liu, L.; Cao, W.; Zhu, G.; Tan, W. A Dean-flow-coupled interfacial viscoelastic fluid for microparticle separation applied in a cell smear method. *Analyst* **2019**, *144* (20), 5934-5946
9. Shi, X.; Tan, W.; Liu, L.; Cao, W.; Wang, Y.; Zhu, G. Separation of exfoliated tumor cells from viscoelastic pleural effusion using a microfluidic sandwich structure. *Analytical and Bioanalytical Chemistry* **2020**, *412* (22), 5513-5523
10. Zhang, T.; Cain, A. K.; Semenec, L.; Pereira, J. V.; Hosokawa, Y.; Yalikul, Y.; Li, M. Bacteria separation and enrichment using viscoelastic flows in a straight microchannel. *Sensors and Actuators B: Chemical* **2023**, *390*, 133918
11. Zhang, T.; Cain, A. K.; Semenec, L.; Liu, L.; Hosokawa, Y.; Inglis, D. W.; Yalikul, Y.; Li, M. Microfluidic Separation and Enrichment of Escherichia coli by Size Using Viscoelastic Flows. *Analytical Chemistry* **2023**, *95*, 2561-2569
12. Cheng, Y.; Zhang, S.; Qin, L.; Zhao, J.; Song, H.; Yuan, Y.; Sun, J.; Tian, F.; Liu, C. Poly(ethylene oxide) Concentration Gradient-Based Microfluidic Isolation of Circulating Tumor Cells. *Analytical Chemistry* **2023**, *95*, 3468-3475
